# Supplementary material
Source: publisher figshare collection journal article supplement (https://acs.figshare.com/ndownloader/files/4483894)

## SUPPLEMENTARY MATERIALS

**Table 1s.** Spectroscopic properties of Fast-FT, blue precursors, and mutants.

| Protein               |           | Absorbance peak, nm | Excitation peak, nm | Emission peak, nm | Extinction coefficient, $M^{-1}cm^{-1}$ * | Quantum yield** |
|-----------------------|-----------|---------------------|---------------------|-------------------|-------------------------------------------|-----------------|
| <b>Fast-FT</b>        | Blue form | 403                 | 403                 | 466               | 18,400                                    | 0.30            |
|                       | Red form  | 583                 | 583                 | 606               | 19,100                                    | 0.09            |
| <b>Fast-FT/S217C</b>  | Blue form | 403                 | 403                 | 466               | 22,110                                    | 0.33            |
|                       | Red form  | 580                 | 581                 | 611               | 57,500                                    | 0.10            |
| <b>Fast-FT/S146A</b>  | Blue form | 403                 | 402                 | 471               | 16,600                                    | 0.27            |
|                       | Red form  | 586                 | 587                 | 609               | 2,300                                     | 0.06            |
| <b>Fast-FT/R70K</b>   | Blue form | 403                 | 407                 | 466               | 5,700                                     | 0.31            |
|                       | Red form  | 582                 | 582                 | 604               | 88,600                                    | 0.07            |
| <b>Fast-FT/S217A</b>  | Blue form | 403                 | 402                 | 466               | 14,600                                    | 0.36            |
|                       | Red form  | 581                 | 581                 | 604               | 81,600                                    | 0.07            |
| <b>Fast-FT/W83L</b>   | Blue form | 410                 | 408                 | 468               | 4,400                                     | 0.21            |
|                       | Red form  | 585                 | 585                 | 609               | 3,400                                     | 0.07            |
| <b>Blue 124/I146S</b> | Blue form | 403                 | 403                 | 461               | 22,300                                    | 0.10            |
|                       | Red form  | 581                 | 583                 | 604               | 95,500                                    | 0.07            |
| <b>Blue 102</b>       | Blue form | 403                 | 403                 | 454               | 11,400                                    | 0.90            |
|                       | Red form  | —                   | —                   | —                 | —                                         | —               |
| <b>Blue 124</b>       | Blue form | 403                 | 402                 | 463               | 19,000                                    | 0.10            |
|                       | Red form  | —                   | —                   | —                 | —                                         | —               |

\*Extinction coefficients of the chromophore absorbance peaks were calculated using the absorbance at 280 nm determined for the respective proteins as described<sup>37</sup>. \*\*Quantum yields were determined with 403 and 580 nm excitation for blue and red forms, respectively; parental FastFT was used as the reference with quantum yields for blue and red forms equal to 0.30 and 0.09, respectively<sup>11</sup>.

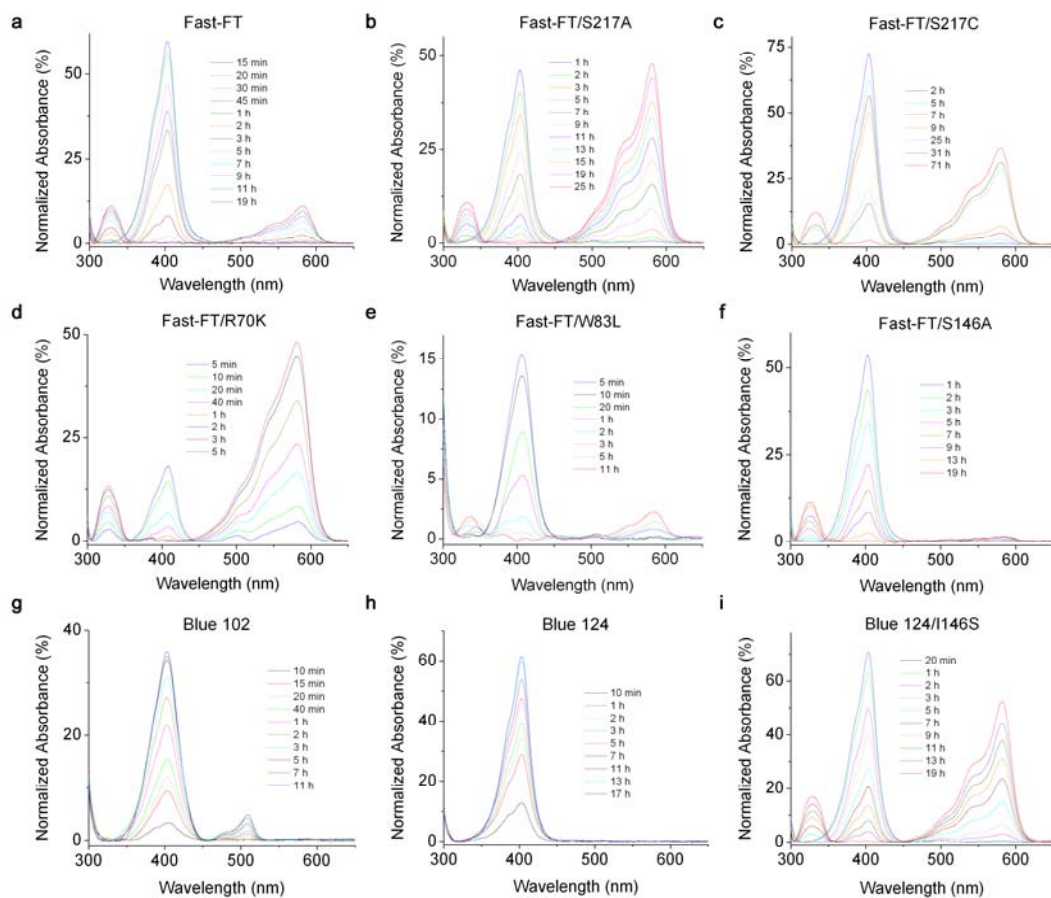

Supplement: Supplementary file 1 [file 4483894]
